# Supplementary material for: Combined effects of waggle dance communication and landscape heterogeneity on nectar and pollen uptake in honey bee colonies
Source: PeerJ. 2017 Jun 7;5:e3441. doi: 10.7717/peerj.3441 (PMC5466000; doi:10.7717/peerj.3441)
Supplement: Supplemental Information 1 [file peerj-05-3441-s003.xlsx]

## Sheet: Tabelle1
vegetation_period	landscape	flcover_all(ha)	%AGR	%SNH	%MFC	Patch_Number	meanPatchSize(ha)	sdPatchSize(ha)
A	Bie	26.1069	85.12	1.21169	21.2668	627	1.86359	4.19452
A	Erl	11.1123	51.14	15.0714	2.01058	1440	0.844408	3.70447
A	Gei	17.9197	89.59	0.443963	15.2441	526	2.26809	3.78719
A	Ger	26.8518	57.54	16.5578	6.08419	1055	1.13761	4.61642
A	Gos	17.2505	60.48	15.782	6.30142	1308	0.917526	2.75379
A	Mbr	32.7838	57.62	9.4853	9.65884	825	1.45442	5.39241
A	Ple	26.2203	87.42	0.763793	20.7576	577	2.08971	4.38181
A	Sch	33.2563	83.06	3.39189	10.7217	741	1.57748	4.15832
B	Bie	6.46363	85.12	1.21169	21.2668	627	1.86359	4.19452
B	Erl	25.9519	51.14	15.0714	2.01058	1440	0.844408	3.70447
B	Gei	3.40454	89.59	0.443963	15.2441	526	2.26809	3.78719
B	Ger	19.3666	57.54	16.5578	6.08419	1055	1.13761	4.61642
B	Gos	23.9872	60.48	15.782	6.30142	1308	0.917526	2.75379
B	Mbr	10.0761	57.62	9.4853	9.65884	825	1.45442	5.39241
B	Ple	4.59745	87.42	0.763793	20.7576	577	2.08971	4.38181
B	Sch	6.05266	83.06	3.39189	10.7217	741	1.57748	4.15832
