# Supplementary material for: Combined effects of waggle dance communication and landscape heterogeneity on nectar and pollen uptake in honey bee colonies
Source: PeerJ. 2017 Jun 7;5:e3441. doi: 10.7717/peerj.3441 (PMC5466000; doi:10.7717/peerj.3441)
Supplement: Supplemental Information 2 [file peerj-05-3441-s004.xlsx]

## Sheet: Tabelle1
timestep	vegetation_period	landscape	treatment	combs	dances	colonyID	weight_0(g)	weight_1(g)	colony_weight_gain(g)	daily_weight_gain(g/day)	pollen_weight(g)
1	A	Ple	hd	horizontal	disoriented	A2	26190	26630	440	146.667	0.2
1	A	Ple	v	vertical	oriented	A3	26320	26990	670	223.333	14.35
1	A	Sch	hd	horizontal	disoriented	B1	25190	25350	160	53.3333	7.36
1	A	Sch	v	vertical	oriented	B3	23070	23310	240	80	19.18
1	A	Bie	hd	horizontal	disoriented	C1	25080	24920	-160	-53.3333	5.68
1	A	Bie	v	vertical	oriented	C3	24410	24390	-20	-6.66667	15.6
1	A	Ger	v	vertical	oriented	D2	26730	26250	-480	-160	19.41
1	A	Ger	hd	horizontal	disoriented	D3	22200	21670	-530	-176.667	0.01
1	A	Mbr	hd	horizontal	disoriented	E1	23930	23660	-270	-90	10.25
1	A	Mbr	v	vertical	oriented	E3	25850	25470	-380	-126.667	1.11
1	A	Gei	v	vertical	oriented	F1	23380	23710	330	110	17.76
1	A	Gei	hd	horizontal	disoriented	F3	23780	23750	-30	-10	0.02
1	A	Gos	hd	horizontal	disoriented	G1	25970	25870	-100	-33.3333	6.2
1	A	Gos	v	vertical	oriented	G3	24070	24140	70	23.3333	0.11
1	A	Erl	v	vertical	oriented	H1	23110	22540	-570	-190	0.83
1	A	Erl	hd	horizontal	disoriented	H3	23670	23190	-480	-160	0.02
2	A	Ger	hd	horizontal	disoriented	A1	23680	23480	-200	-66.6667	0.12
2	A	Ger	v	vertical	oriented	A2	26400	26230	-170	-56.6667	0.07
2	A	Gos	v	vertical	oriented	B2	23160	23100	-60	-20	2.82
2	A	Gos	hd	horizontal	disoriented	B3	23270	23110	-160	-53.3333	NA
2	A	Mbr	v	vertical	oriented	C1	25020	24890	-130	-43.3333	6.39
2	A	Mbr	hd	horizontal	disoriented	C2	24330	24190	-140	-46.6667	16.78
2	A	Gei	hd	horizontal	disoriented	D1	24060	24130	70	23.3333	2.59
2	A	Gei	v	vertical	oriented	D2	26390	26540	150	50	4.23
2	A	Sch	hd	horizontal	disoriented	E1	24280	24060	-220	-73.3333	11.32
2	A	Sch	v	vertical	oriented	E3	26370	26500	130	43.3333	6.45
2	A	Erl	hd	horizontal	disoriented	F1	23540	23300	-240	-80	0.02
2	A	Erl	v	vertical	oriented	F3	23530	23530	0	0	6.16
2	A	Ple	hd	horizontal	disoriented	G1	26140	26500	360	120	1.29
2	A	Ple	v	vertical	oriented	G3	24450	24960	510	170	3.98
2	A	Bie	v	vertical	oriented	H2	23080	22930	-150	-50	6.16
2	A	Bie	hd	horizontal	disoriented	H3	23570	23320	-250	-83.3333	2.48
3	A	Gei	hd	horizontal	disoriented	A1	24250	23800	-450	-150	18.11
3	A	Gei	v	vertical	oriented	A2	26760	26260	-500	-166.667	15.29
3	A	Ple	hd	horizontal	disoriented	B1	25270	24800	-470	-156.667	18.56
3	A	Ple	v	vertical	oriented	B2	23280	22840	-440	-146.667	30.24
3	A	Sch	v	vertical	oriented	C1	25310	25040	-270	-90	4.56
3	A	Sch	hd	horizontal	disoriented	C2	24520	24130	-390	-130	25.28
3	A	Erl	hd	horizontal	disoriented	D1	24160	23830	-330	-110	2.12
3	A	Erl	v	vertical	oriented	D2	26600	26470	-130	-43.3333	7.06
3	A	Gos	hd	horizontal	disoriented	E1	24450	23880	-570	-190	7.13
3	A	Gos	v	vertical	oriented	E2	25060	24520	-540	-180	5.34
3	A	Bie	v	vertical	oriented	F1	23680	23230	-450	-150	14.26
3	A	Bie	hd	horizontal	disoriented	F2	24090	23510	-580	-193.333	8.78
3	A	Ger	hd	horizontal	disoriented	G1	26410	25880	-530	-176.667	0.03
3	A	Ger	v	vertical	oriented	G3	25100	24880	-220	-73.3333	0.08
3	A	Mbr	hd	horizontal	disoriented	H1	23110	22800	-310	-103.333	4.27
3	A	Mbr	v	vertical	oriented	H2	23250	22990	-260	-86.6667	8.91
4	A	Erl	v	vertical	oriented	A2	25920	25440	-480	-160	4.2
4	A	Erl	hd	horizontal	disoriented	A3	NA	25970	NA	NA	1.84
4	A	Ger	v	vertical	oriented	B2	22930	22530	-400	-133.333	0.22
4	A	Ger	hd	horizontal	disoriented	B3	22790	22440	-350	-116.667	0.09
4	A	Gos	v	vertical	oriented	C1	25040	24820	-220	-73.3333	32.03
4	A	Gos	hd	horizontal	disoriented	C2	24060	23770	-290	-96.6667	19.73
4	A	Bie	hd	horizontal	disoriented	D1	23980	23800	-180	-60	15.69
4	A	Bie	v	vertical	oriented	D2	26630	26230	-400	-133.333	41.41
4	A	Ple	v	vertical	oriented	E1	23940	23550	-390	-130	39.01
4	A	Ple	hd	horizontal	disoriented	E2	24600	24300	-300	-100	29.7
4	A	Mbr	v	vertical	oriented	F1	23270	23060	-210	-70	34.05
4	A	Mbr	hd	horizontal	disoriented	F2	23570	23400	-170	-56.6667	15.52
4	A	Gei	v	vertical	oriented	G1	26330	26070	-260	-86.6667	26.61
4	A	Gei	hd	horizontal	disoriented	G3	24930	24690	-240	-80	3.1
4	A	Sch	hd	horizontal	disoriented	H2	22790	22570	-220	-73.3333	0.53
4	A	Sch	v	vertical	oriented	H3	23080	22810	-270	-90	4.53
5	B	Bie	hd	horizontal	disoriented	A1	23040	22950	-90	-30	5.48
5	B	Bie	v	vertical	oriented	A2	25510	25300	-210	-70	9.35
5	B	Gei	v	vertical	oriented	B1	24410	24260	-150	-50	9.63
5	B	Gei	hd	horizontal	disoriented	B3	22650	22590	-60	-20	15.59
5	B	Ple	hd	horizontal	disoriented	C1	24830	24840	10	3.33333	7.22
5	B	Ple	v	vertical	oriented	C3	23990	24070	80	26.6667	17.65
5	B	Mbr	hd	horizontal	disoriented	D1	23740	23770	30	10	2.73
5	B	Mbr	v	vertical	oriented	D2	26170	26190	20	6.66667	2.57
5	B	Ger	hd	horizontal	disoriented	E1	23700	23490	-210	-70	0.13
5	B	Ger	v	vertical	oriented	E2	24470	24280	-190	-63.3333	0.04
5	B	Sch	hd	horizontal	disoriented	F2	23210	23250	40	13.3333	6.72
5	B	Sch	v	vertical	oriented	F3	23270	23200	-70	-23.3333	0.22
5	B	Erl	hd	horizontal	disoriented	G2	26930	26680	-250	-83.3333	0.07
5	B	Erl	v	vertical	oriented	G3	24470	24150	-320	-106.667	0.21
5	B	Gos	hd	horizontal	disoriented	H2	22570	22670	100	33.3333	5.96
5	B	Gos	v	vertical	oriented	H3	22820	22970	150	50	8.82
6	B	Mbr	v	vertical	oriented	A1	22950	22470	-480	-160	2.87
6	B	Mbr	hd	horizontal	disoriented	A3	26040	25580	-460	-153.333	1.32
6	B	Erl	v	vertical	oriented	B1	24200	23820	-380	-126.667	0.05
6	B	Erl	hd	horizontal	disoriented	B3	22520	21880	-640	-213.333	0.25
6	B	Ger	hd	horizontal	disoriented	C1	24480	24250	-230	-76.6667	0.45
6	B	Ger	v	vertical	oriented	C2	23480	23080	-400	-133.333	0.22
6	B	Sch	hd	horizontal	disoriented	D2	25990	25640	-350	-116.667	0.14
6	B	Sch	v	vertical	oriented	D3	21090	20950	-140	-46.6667	4.45
6	B	Gei	hd	horizontal	disoriented	E1	23760	23490	-270	-90	3.02
6	B	Gei	v	vertical	oriented	E2	24480	24230	-250	-83.3333	1.95
6	B	Gos	v	vertical	oriented	F2	23110	22750	-360	-120	2.3
6	B	Gos	hd	horizontal	disoriented	F3	23100	22860	-240	-80	0.24
6	B	Bie	hd	horizontal	disoriented	G1	25850	25570	-280	-93.3333	4
6	B	Bie	v	vertical	oriented	G2	26700	26240	-460	-153.333	4.82
6	B	Ple	v	vertical	oriented	H1	22290	21630	-660	-220	9.73
6	B	Ple	hd	horizontal	disoriented	H3	22960	22330	-630	-210	5.11
7	B	Sch	hd	horizontal	disoriented	A1	22510	21880	-630	-210	2.95
7	B	Sch	v	vertical	oriented	A3	25460	24800	-660	-220	8.82
7	B	Bie	hd	horizontal	disoriented	B1	23840	23560	-280	-93.3333	7.41
7	B	Bie	v	vertical	oriented	B2	22360	21980	-380	-126.667	26.68
7	B	Gei	hd	horizontal	disoriented	C1	24430	24070	-360	-120	1.6
7	B	Gei	v	vertical	oriented	C3	23710	23430	-280	-93.3333	8.54
7	B	Gos	v	vertical	oriented	D1	23370	22940	-430	-143.333	1.14
7	B	Gos	hd	horizontal	disoriented	D3	20920	20620	-300	-100	0.48
7	B	Erl	v	vertical	oriented	E2	24100	23450	-650	-216.667	0.09
7	B	Erl	hd	horizontal	disoriented	E3	25700	25000	-700	-233.333	0.02
7	B	Ple	v	vertical	oriented	F1	22590	22030	-560	-186.667	2.06
7	B	Ple	hd	horizontal	disoriented	F3	22950	22500	-450	-150	1.13
7	B	Mbr	v	vertical	oriented	G2	26270	25780	-490	-163.333	3.77
7	B	Mbr	hd	horizontal	disoriented	G3	23450	23040	-410	-136.667	1.87
7	B	Ger	hd	horizontal	disoriented	H2	22010	21620	-390	-130	1.25
7	B	Ger	v	vertical	oriented	H3	22360	22060	-300	-100	2.56
8	B	Gos	hd	horizontal	disoriented	A1	21890	21840	-50	-16.6667	8.26
8	B	Gos	v	vertical	oriented	A2	24520	24430	-90	-30	14.68
8	B	Mbr	v	vertical	oriented	B1	23530	23590	60	20	1.85
8	B	Mbr	hd	horizontal	disoriented	B2	22010	22000	-10	-3.33333	1.62
8	B	Erl	v	vertical	oriented	C1	23970	23910	-60	-20	0.35
8	B	Erl	hd	horizontal	disoriented	C2	22780	22700	-80	-26.6667	0.69
8	B	Ple	hd	horizontal	disoriented	D1	22870	23060	190	63.3333	1.67
8	B	Ple	v	vertical	oriented	D2	25140	25330	190	63.3333	10.33
8	B	Bie	v	vertical	oriented	E1	22810	22850	40	13.3333	29.45
8	B	Bie	hd	horizontal	disoriented	E3	25250	25230	-20	-6.66667	11.89
8	B	Ger	hd	horizontal	disoriented	F2	22240	22450	210	70	1.13
8	B	Ger	v	vertical	oriented	F3	22400	22550	150	50	0.56
8	B	Sch	v	vertical	oriented	G2	25710	25720	10	3.33333	3.46
8	B	Sch	hd	horizontal	disoriented	G3	22900	22730	-170	-56.6667	6.74
8	B	Gei	hd	horizontal	disoriented	H2	21770	21730	-40	-13.3333	3.41
8	B	Gei	v	vertical	oriented	H3	22160	22170	10	3.33333	5.56
